# Supplementary material for: Fabrication of mesoporous carbon supported Ni–Mo catalysts for the enhanced conversion of glucose to ethylene glycol
Source: Royal Society of Chemistry journal article supplement (doi:10.1039/d0nj03196h), 2020-01-01
Supplement: d0nj03196h1.pdf [file d0nj03196h1.pdf]

## Supplementary Information

---

### Fabrication of mesoporous carbon supported Ni-Mo catalyst for the enhanced conversion of glucose to ethylene glycol

Arun Arunima Kirali, Sreejith Sreekantan, Banu Marimuthu\*

*Catalysis and Inorganic Chemistry Division, CSIR-National Chemical Laboratory, Dr.Homi Bhabha Road, Pune-411008, India*

---

- Fig. S1** Nitrogen adsorption-desorption isotherms of Ni-Mo/MC catalysts.
- Fig. S2** NH<sub>3</sub>-TPD profiles of reduced 3% Ni/MC, 15% Mo/MC and 3% Ni-15% Mo/MC.
- Fig. S3** TEM images of used 3% Ni-15% Mo/MC.
- Fig. S4** FT-Raman spectra of MC, reduced 3% Ni-15% Mo/MC and used 3% Ni-15% Mo/MC.
- Table S1** Crystallite size of MoO<sub>3</sub> and MoO<sub>2</sub> present in x Ni-y Mo/MC catalysts.
- Table S2** Comparative catalytic conversion of glucose into EG.

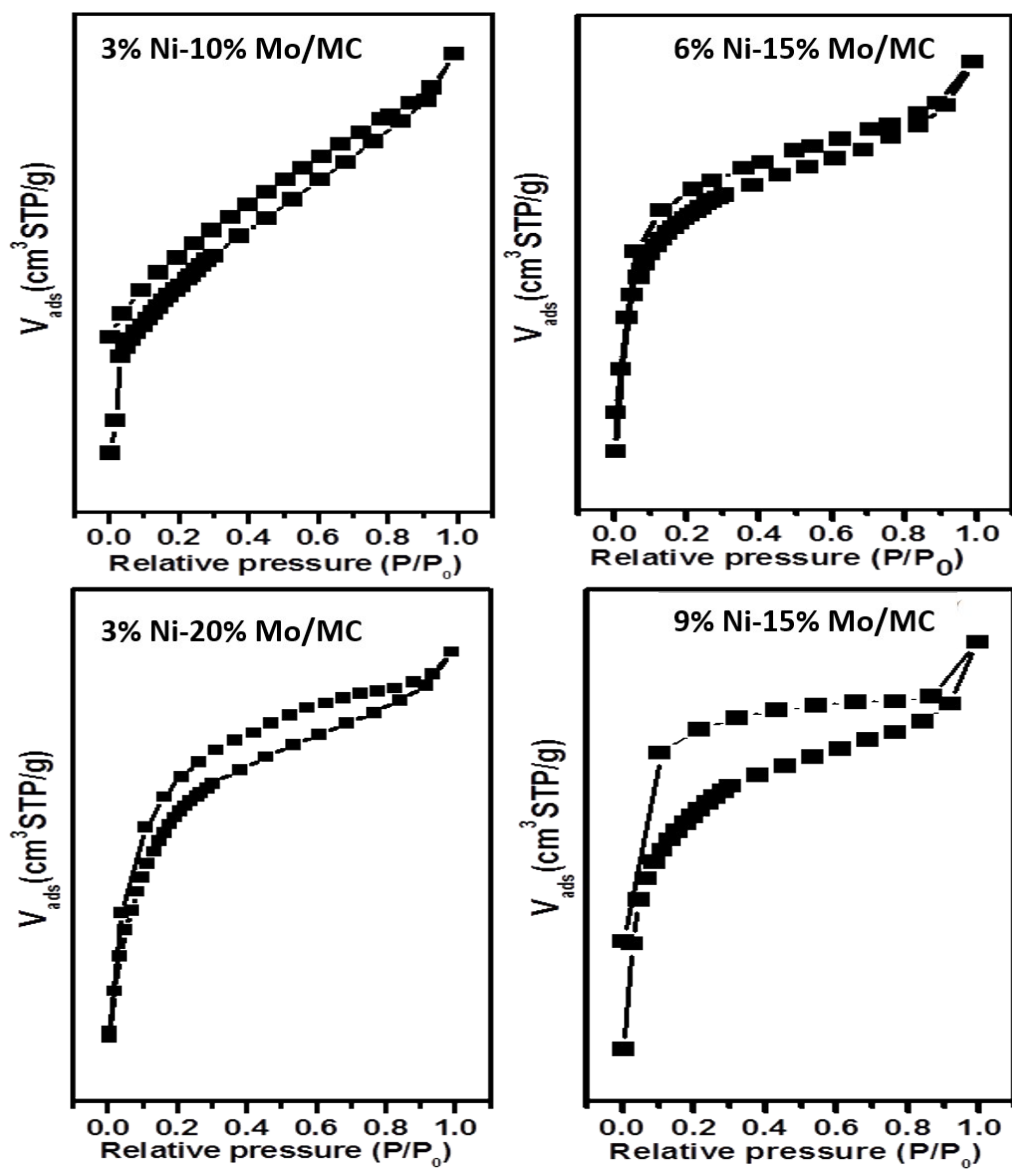

Fig. S1 Nitrogen adsorption-desorption isotherms of Ni-Mo/MC catalysts.

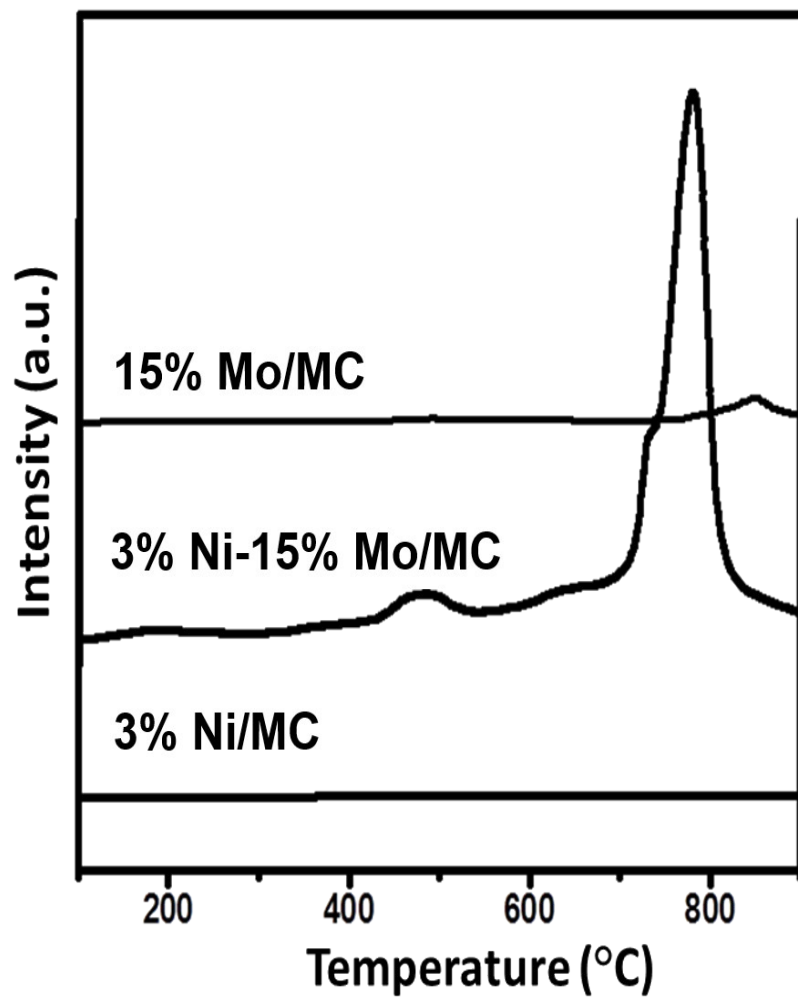

**Fig. S2** NH<sub>3</sub>-TPD profiles of reduced 3% Ni/MC, 15% Mo/MC and 3% Ni-15% Mo/MC.

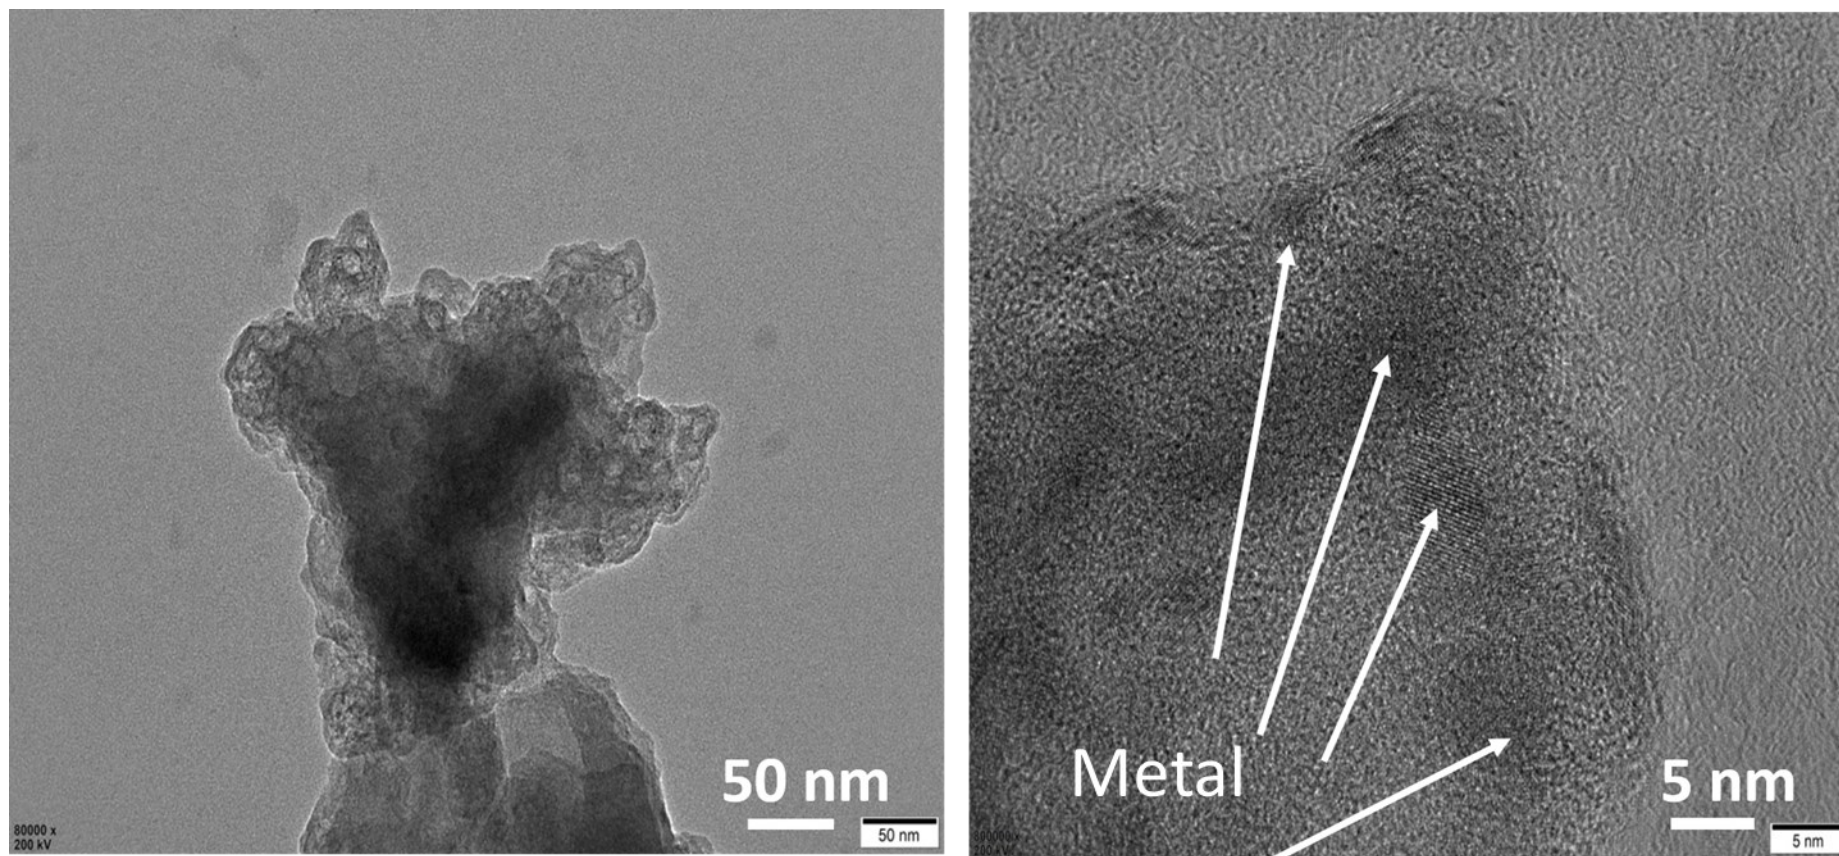

**Fig. S3** TEM images of used 3% Ni-15% Mo/MC

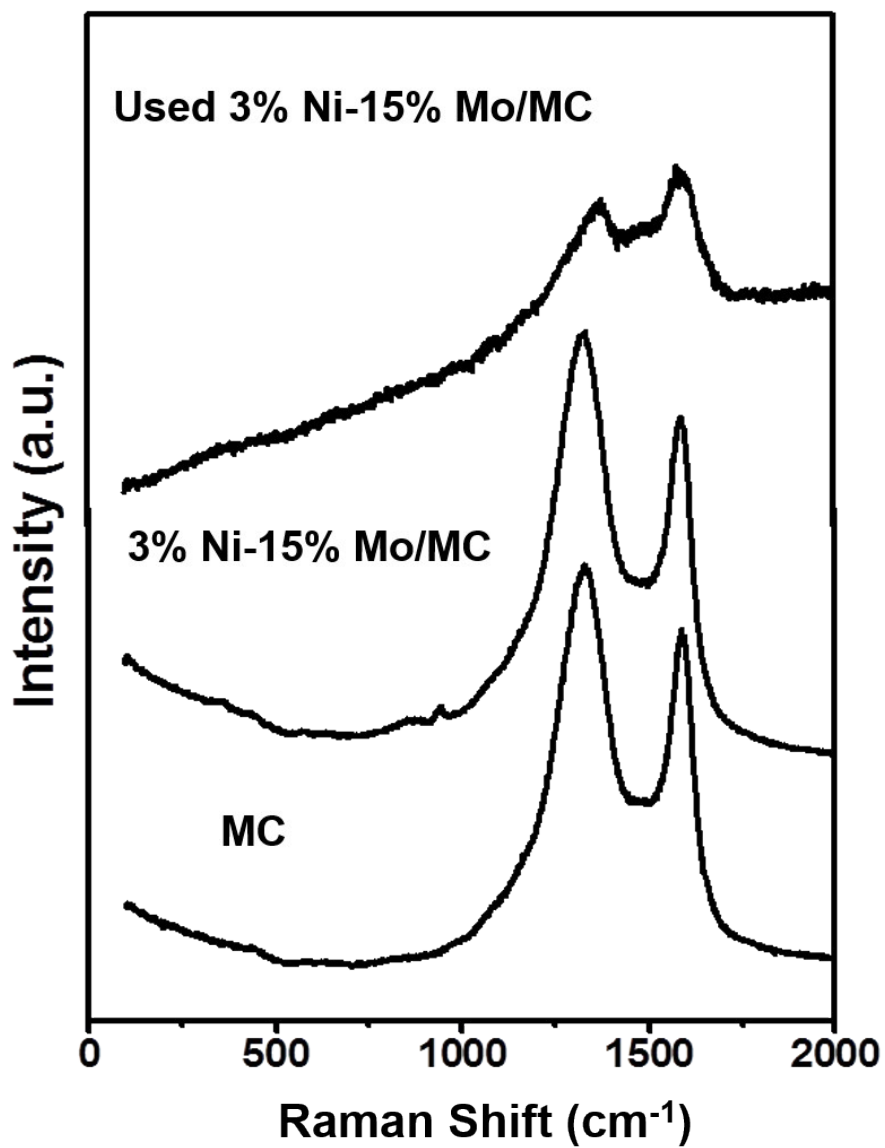

**Fig. S4** FT-Raman spectra of MC, reduced 3% Ni-15% Mo/MC and used 3% Ni-15% Mo/MC.

**Table S1** Crystallite size of MoO<sub>3</sub> and MoO<sub>2</sub> present in x Ni-y Mo/MC catalysts

| Catalyst         | Crystallite size (nm) |                  |
|------------------|-----------------------|------------------|
|                  | MoO <sub>3</sub>      | MoO <sub>2</sub> |
| 3% Ni -15% Mo/MC | 19.5                  | 8.5              |
| 6% Ni- 15% Mo/MC | 17.5                  | 7.1              |
| 9% Ni-15% Mo/MC  | 14.2                  | 10.4             |

**Table S2** Comparative study on catalytic conversion of glucose into EG

| Catalyst                          | Reaction conditions |                               |                   |                                       |                 | Selectivity of EG (%) | References   |
|-----------------------------------|---------------------|-------------------------------|-------------------|---------------------------------------|-----------------|-----------------------|--------------|
|                                   | T (°C)              | H <sub>2</sub> pressure (bar) | Reaction time (h) | Glucose concentration in the feed (%) | Reactor type    |                       |              |
| Ru-AMT/AC                         | 240                 | 50                            | 0.67              | 10                                    | Semi-continuous | 60                    | [16]         |
| Ru-AMT/AC                         | 240                 | 50                            | 0.67              | 10                                    | Batch           | 7                     | [16]         |
| Ni-W <sub>2</sub> C/AC            | 245                 | 60                            | 3                 | 20                                    | Batch           | 8                     | [10]         |
| Ni-W <sub>2</sub> C/AC            | 245                 | 60                            | 3                 | 20                                    | Fed-batch       | 47                    | [10]         |
| Ni-MgO                            | 220                 | 60                            | 3                 | 1                                     | Batch           | 23                    | [20]         |
| 5% Ni-15% WO <sub>3</sub> /SBA-15 | 175                 | 60                            | 1.33              | 1.25                                  | Batch           | 41.5                  | [5]          |
| 3% Ni-15% Mo/MC                   | 200                 | 40                            | 6                 | 15%                                   | Batch           | 63.2                  | Present work |
